# Supplementary material for: PTPN11-Related Noonan Syndrome Predisposes to Multifocal Low-Grade CNS Tumors Harboring FGFR1 Variants
Source: Research Square preprint supplement (doi:10.21203/rs.3.rs-8662616/v1), 2026-01-28
Supplement: Supplementary file 2 [file 65186a18857dbeef484c2558.docx]

***PTPN11*-Related Noonan Syndrome Predisposes to Multifocal Low-Grade CNS Tumors Harboring *FGFR1* Variants**

Gary Kohanbash1,2, Scott Ryall3,4, Sam E. Gary1, Lindsey M. Hoffman5, Robert Siddaway6, Anne E. Bendel7, Karen W. Gripp8, Andrew W. Walter9, Jordan R. Hansford10, Amy A. Smith11, Hong Wang12, John M. Skaugen13, Uri Tabori14, Cynthia E. Hawkins4,6, Alberto Broniscer15

1Department of Neurological Surgery, University of Pittsburgh, UPMC Children’s Hospital of Pittsburgh, Pittsburgh, PA.

2Department of Immunology, University of Pittsburgh, Pittsburgh, PA.

3The Arthur and Sonia Labatt Brain Tumour Research Center, The Hospital for Sick Children, Toronto, Ontario, Canada

4Department of Laboratory Medicine and Pathobiology, Faculty of Medicine, University of Toronto, Toronto, Ontario, Canada

5Division of Hematology-Oncology, Children’s Hospital of Colorado, Aurora, CO

6Department of Paediatric Laboratory Medicine, Division of Pathology, The Hospital for Sick Children, Toronto, Ontario, Canada

7Division of Hematology-Oncology, Children’s Minnesota, Minneapolis, MN

8Division of Medical Genetics, Nemours Children’s Health, Wilmington, DE

9Division of Hematology-Oncology, Nemours Children’s Health, Wilmington, DE

10Division of Oncology, the Royal Children’s Hospital, Melbourne Australia

11Division of Pediatric Hematology-Oncology, Arnold Palmer Hospital, Orlando, FL

12School of Public Health, University of Pittsburgh, Pittsburgh, PA

13Department of Pathology, University of Pittsburgh, Pittsburgh, PA

14Division of Pediatric Hematology-Oncology, Department of Pediatrics, The Hospital for Sick Children, Toronto, Ontario, Canada

15Department of Pediatrics, Division of Pediatric Hematology-Oncology, UPMC Children’s Hospital of Pittsburgh, Pittsburgh, PA

**Running title**: Brain tumors in Noonan syndrome

**Correspondence**:

Alberto Broniscer, M.D., M.S. 32 Academy Street Arlington, MA 02476; Tel: 412 628-2797; email: [albertobroniscer5704@gmail.com](mailto:albertobroniscer5704@gmail.com)

Gary Kohanbash, PhD. UPMC Children's Hospital of Pittsburgh. 7128 Rangos Research Building. 530 45th St. Pittsburgh, PA, 15201. Tel: 412 692-9456. Fax: (412) 692-8906; email: [gary.kohanbash2@chp.edu](mailto:gary.kohanbash2@chp.edu)

**Changes in affiliation:**

1. Scott Ryall, Ph.D. – Instructor in Pathology, Brigham and Women’s Hospital, Boston, MA
2. Lindsey M. Hoffman – Medical director at Johnson & Johnson, Phoenix, AZ
3. Jordan R. Hansford – Faculty of Health and Medical Sciences University of Adelaide, Adelaide, Australia
4. Alberto Broniscer – Senior medical director at Servier Pharmaceuticals, Boston, MA

**Supplementary Material:**

Supplemental Table 1. Priority genes analyzed.

Supplemental Table 2. Distribution of *PTPN11* genotypes.

Supplemental Table 3. Results of DNA methylation analysis.

Supplemental Table 4. Central radiological review.

Supplemental Table 5. Summary of previously published cases.
